# Supplementary material for: Emerging Applications of Bedside 3D Printing in Plastic Surgery
Source: PubMed Central journal article supplement (PMC4468745; doi:10.3389/fsurg.2015.00025), 2015-06-16
Supplement: table_1.pdf [file table_1.pdf]

## Supplementary Table

Supplementary Table 1. **A summary of the printing time and the amount of print material used to produce the 3D printed models in plastic and reconstructive surgery mentioned in the manuscript.** Abbreviations: DIEA: deep inferior epigastric artery; CMC: carpometacarpal; 4D: four dimensional)

| Model                          | 3D Print Time (hr) | Percentage of a 3D Print Cartridge used (cost in USD) |
|--------------------------------|--------------------|-------------------------------------------------------|
| Soft tissue ankle defect       | 12.5               | 50% (27)                                              |
| “Reverse” mode of ankle defect | 8.5                | 25% (13.5)                                            |
| Soft tissue sacral defect      | 12.5               | 50% (27)                                              |
| Asymmetrical breasts           | 15                 | 50% (27)                                              |
| DIEA                           | 42                 | 55% (30)                                              |
| Subluxed first CMC joint       | 10.5               | 20% (11)                                              |
| 4D printed wrist               | 2-7                | 15% (8)                                               |
